# Supplementary material
Source: publisher figshare collection journal article supplement (https://aacr.figshare.com/ndownloader/files/39848540)
Supplement: Supplementary file 1 [file 39848540]

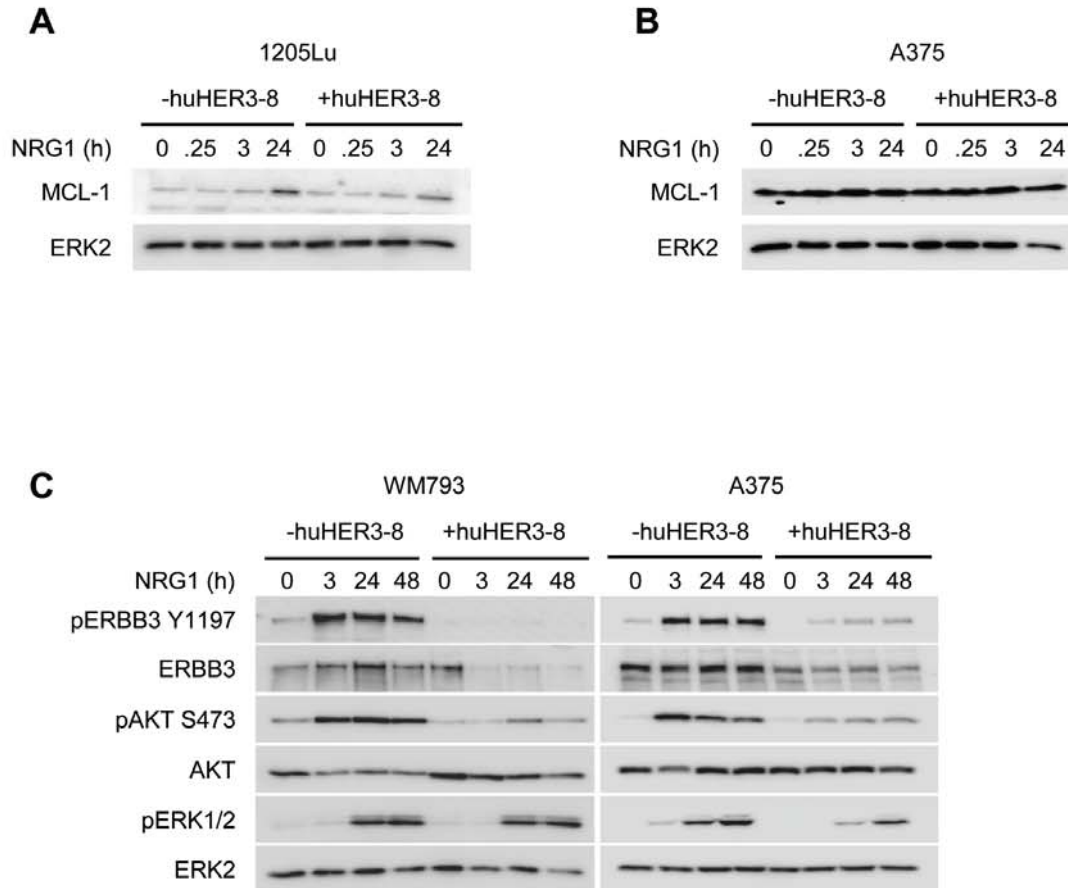

**Supplementary Figure S5. huHER3-8 blocks adaptive upregulation of ERBB3 following combined RAF and MEK inhibition. A&B)** 1205Lu and A375 lysates were analyzed by Western blot for MCL-1 (BD Biosciences San Jose, CA ; #559027). **C)** WM793 and A375 cells were plated and treated overnight with vemurafenib (1  $\mu$ M) and GSK1120212/trametinib (100 nM). Cells were then treated with huHER3-8 and NRG1, as previously described, before lysis and analysis by Western blotting.
